# Supplementary material
Source: MDPI journal article supplement (https://www.mdpi.com/2075-4701/12/4/607)
Supplement: s1 [file s1]

# Antisolvent Precipitation for Metal Recovery from Citric Acid Solution in Recycling of NMC Cathode Materials

Wen Xuan <sup>1</sup>, Alexandre Chagnes <sup>1,\*</sup>, Xiong Xiao <sup>2</sup>, Richard T. Olsson <sup>2</sup> and Kerstin Forsberg <sup>3,\*</sup>

<sup>1</sup> GeoRessources, Université de Lorraine, CNRS, F-54000 Nancy, France; wen.xuan@univ-lorraine.fr

<sup>2</sup> Department of Fibre and Polymer Technology, KTH Royal Institute of Technology, 10044 Stockholm, Sweden; xiongxi@kth.se (X.X.), rols@kth.se (R.T.O.)

<sup>3</sup> Department of Chemical Engineering, KTH Royal Institute of Technology, 10044 Stockholm, Sweden

\* Correspondence: alexandre.chagnes@univ-lorraine.fr (A.C.); kerstino@kth.se (K.F.)

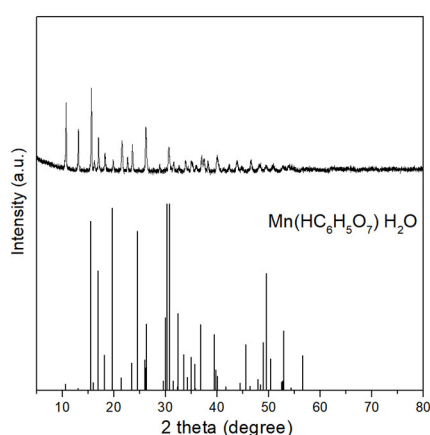

**Figure S1.** XRD pattern of the leach residue and the reference pattern of manganese citrate monohydrate,  $\text{Mn}(\text{HC}_6\text{H}_5\text{O}_7)\text{H}_2\text{O}$  [1].

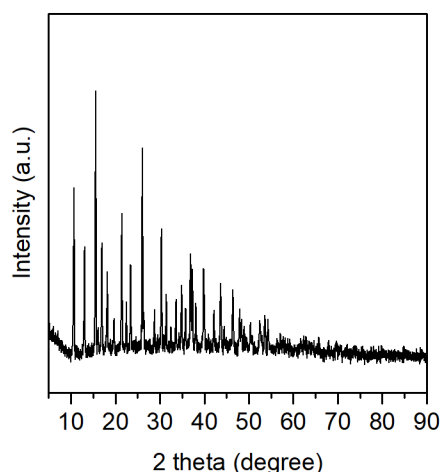

**Figure S2.** XRD pattern of the precipitate from the manganese citric acid ethanol system (M7).

**Citation:** Xuan, W.; Chagnes, A.; Xiao, X.; Olsson, R.T.; Forsberg, K. Antisolvent Precipitation for Metal Recovery from Citric Acid Solution in Recycling of NMC Cathode Materials. *Metals* **2022**, *12*, 607. <https://doi.org/10.3390/met12040607>

Academic Editor: Jiro Kitagawa

Received: 4 March 2022

Accepted: 30 March 2022

Published: 31 March 2022

**Publisher's Note:** MDPI stays neutral with regard to jurisdictional claims in published maps and institutional affiliations.

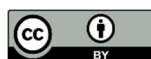

**Copyright:** © 2022 by the authors. Licensee MDPI, Basel, Switzerland. This article is an open access article distributed under the terms and conditions of the Creative Commons Attribution (CC BY) license (<https://creativecommons.org/licenses/by/4.0/>).

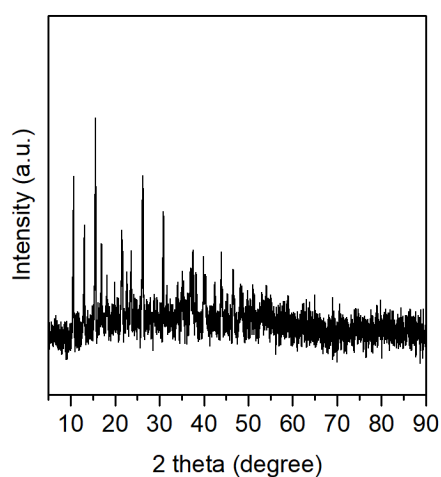

**Figure S3.** XRD pattern of the precipitate from the cobalt citric acid ethanol system (C7).

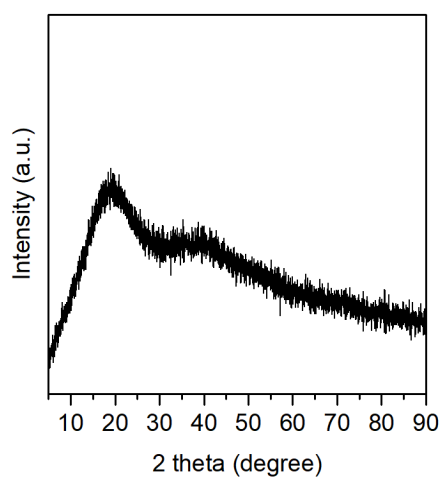

**Figure S4.** XRD pattern of the precipitate from the nickel citric acid acetone system (N8).

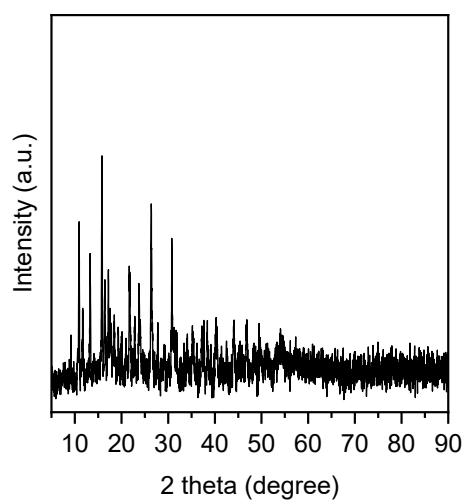

**Figure S5.** XRD pattern of the mixed solid phase from the NMC leach liquor acetone system (LNMC4).

## Reference

1. Deng, Y.-F.; Zhou, Z.-H.; Wan, H.-L.; Ng, S.W.  $\Delta$ -Aqua-S-citrato(2-)-manganese(II). *Acta crystallographica. Section E, Structure reports online* **2003**, *59*, m310–m312. <https://doi.org/10.1107/S1600536803009383>.
